# Supplementary material
Source: HighWire-hosted journal article supplement (https://rapm.bmj.com/content/47/2/79)
Supplement: inline-supplementary-material-2 [file inline-supplementary-material-2.pdf]

**Supplemental Table 2** Results of sensitivity analysis for robustness of unmeasured confounders.

| <b>Outcome variable</b>                                      | <b>Effect size</b> | <b>RR for ESPB<sup>a</sup></b> | <b>E-values<sup>b</sup></b> |
|--------------------------------------------------------------|--------------------|--------------------------------|-----------------------------|
| Length of stay total (hours)                                 | -0.19              | 0.84                           | 1.31                        |
| Length of stay in nursing floor (hours)                      | -0.19              | 0.84                           | 1.32                        |
| PCA opioid consumption total (MED)                           | -0.28              | 0.78                           | 1.39                        |
| Opioid consumption in first 24h (MED)                        | -0.28              | 0.77                           | 1.39                        |
| Opioid consumption after 24h post-surgery to discharge (MED) | -0.17              | 0.86                           | 1.30                        |
| Postoperative antiemetic use                                 | -                  | 0.79                           | 1.83                        |

*Abbreviations:* ESPB erector spinae plane block; MED; morphine equivalent dose; RR: Risk ratio

a: indicates the RR for binary variables, or calculated risk ratio equivalent for differences of continuous variables<sup>20</sup>

b: the E-value indicates the robustness of unmeasured confounders where a large E-value implies that substantial unmeasured confounding is necessary to explain observed significance differences.<sup>20</sup>
